# Supplementary material for: A randomized controlled trial on the effects of “Global Postural Re-education” versus neck specific exercise on pain, disability, postural control, and neuromuscular features in women with chronic non-specific neck pain
Source: PubMed Central journal article supplement — Eur J Phys Rehabil Med. 2023 Jan 4;59(1):42–53. doi: 10.23736/S1973-9087.22.07554-2 (PMC10035445; doi:10.23736/s1973-9087.22.07554-2), 2023-01-04
Supplement: Supplementary_Digital_Material1.pdf [file Supplementary_Digital_Material1.pdf]

## SUPPLEMENTARY DIGITAL MATERIAL 1

Supplementary Table I.—Exercises.

|              |                                                                                                                                                                                                                                                                                                                                                                                                                                                                                                                                                                                                                                                             |
|--------------|-------------------------------------------------------------------------------------------------------------------------------------------------------------------------------------------------------------------------------------------------------------------------------------------------------------------------------------------------------------------------------------------------------------------------------------------------------------------------------------------------------------------------------------------------------------------------------------------------------------------------------------------------------------|
| GPR<br>group | <p>Autoposture in lying position on the floor, the participant practices the posture without pain, keeping the breathing to the same as what perform with the physical therapist in sessions.</p> <p>With back stretched, flexion of the hips and the knees and closed legs, the participant exhale deeply. After some breathings the partipant move the hips in a posterior tilt position and stretch the neck with guidance of the hands. The participant maintain the position with breathing in different angles of the arms.</p> <p>The participant needs to repeat the exercises (15 minutes) every day except in the days of presential session.</p> |
| SE<br>Group  | <p>Sitting in a chair, the participant perform exercises (Flexion, extension, rotation, inclination and stretches of the neck) twice a week. Each exercise should be performed without causing pain while maintaining a quiet breathing.</p> <p>10 repetitions each movement and 30 seconds for the stretches. The execution of all exercises should take about 15 minutes.</p>                                                                                                                                                                                                                                                                             |
